# Supplementary material for: The Future of Critical Care: Optimizing Technologies and a Learning Healthcare System to Potentiate a More Humanistic Approach to Critical Care
Source: PubMed Central journal article supplement — Crit Care Explor. 2022 Mar 15;4(3):e0659. doi: 10.1097/CCE.0000000000000659 (PMC8926065; doi:10.1097/cce.0000000000000659), 2022-03-15
Supplement: cc9-4-e0659-s001.pdf [file cc9-4-e0659-s001.pdf]

## Appendix A

### Process and Timeline for Task Force Development of Manuscript

| Date          | Action                                                                                          | Notes                                                                                               |
|---------------|-------------------------------------------------------------------------------------------------|-----------------------------------------------------------------------------------------------------|
| November 2020 | Appointment of Taskforce<br>Co-Chairs                                                           | Appointment from SCCM<br>president                                                                  |
| December 2020 | Co-Chairs met with SCCM<br>president to discuss the<br>charge and deliverables                  |                                                                                                     |
| December 2020 | Discussion of council<br>proposed taskforce members                                             | Chairs identified gaps in<br>taskforce and proposed<br>additional suggested for<br>council approval |
| December 2020 | Co-Chairs begin discussions<br>on how to outline manuscript                                     |                                                                                                     |
| February 2021 | Taskforce members selected<br>and approved by Council and<br>official appointments<br>completed |                                                                                                     |
| March 2021    | Co-Chair meeting convened<br>with SCCM president-elect to                                       |                                                                                                     |

|            |                                                                     |                                                                                                                                                                                                                                        |
|------------|---------------------------------------------------------------------|----------------------------------------------------------------------------------------------------------------------------------------------------------------------------------------------------------------------------------------|
|            | discuss charge and outline next steps.                              |                                                                                                                                                                                                                                        |
| March 2021 | Thought-gathering survey created and completed by taskforce members | Goal to collect initial thoughts of the taskforce members prior to first meeting. These thoughts would serve as foundational concepts to be discussed at first taskforce meeting. Some survey results are also included in Appendix B. |
| March 2021 | First taskforce meeting occurs                                      | Charge outlined and discussed as a group. Brainstorming begins. Group also identifies a need to include a patient as part of the taskforce to incorporate the patient perspective.                                                     |
| April 2021 | Second taskforce meeting occurs                                     | Subcommittees form by self-identified areas of expertise. Additional taskforce member                                                                                                                                                  |

|            |                                                                               |                                                                                                                                                 |
|------------|-------------------------------------------------------------------------------|-------------------------------------------------------------------------------------------------------------------------------------------------|
|            |                                                                               | (patient perspective) added to group.                                                                                                           |
| April 2021 | First imagined patient case created and sent to group for consideration       | Subcommittees use case as a starting point to imagine potential future patient care scenarios through the lens of their subcommittee expertise. |
| April 2021 | Third Taskforce Meeting                                                       | Discussion of case and additional thoughts to add and expand innovation throughout case. Additional topics identified.                          |
| May 2021   | Timeline of deliverables completed                                            |                                                                                                                                                 |
| June 2021  | Final subcommittees created. Subcommittees meet and discuss content.          |                                                                                                                                                 |
| July 2021  | Subcommittees submit initial drafts of content to be included in final draft. |                                                                                                                                                 |

|                       |                                                                                                  |                                                                                                                           |
|-----------------------|--------------------------------------------------------------------------------------------------|---------------------------------------------------------------------------------------------------------------------------|
| July - September 2021 | Co-Chairs actively integrate content from subcommittees and edit content into single manuscript. |                                                                                                                           |
| September 2021        | Final draft manuscript goes to all taskforce members for editing.                                | Edits and additions received by co-chairs are integrated into manuscript.                                                 |
| September 2021        | Final draft of manuscript delivered to SCCM Council for approval.                                | Additional suggestions from SCCM Council are added into manuscript for final draft.<br><br>Manuscript approved by council |
| October 2021          | Manuscript submitted to <i>Critical Care Medicine</i> .                                          |                                                                                                                           |
